# Supplementary material for: Single and bicomponent anionic dyes adsorption equilibrium studies on magnolia-leaf-based porous carbons
Source: Royal Society of Chemistry journal article supplement (doi:10.1039/c5ra11568j), 2015-01-01
Supplement: c5ra11568j1.pdf [file c5ra11568j1.pdf]

*Supporting information for*

## **Single and Bicomponent Anionic Dyes Adsorption Equilibrium**

### **Studies on Magnolia-Leaf-Based Porous Carbons**

Huijing Yu,<sup>a</sup> Tingting Wang,<sup>a</sup> Wei Dai,<sup>\*a</sup> Xianxing Li,<sup>a</sup> Xin Hu,<sup>a</sup> and Na Ma<sup>\*b</sup>

<sup>a</sup>College of Chemistry and Life Science, Zhejiang Normal University, Zhejiang Province Jinhua  
321004, People's Republic of China

<sup>b</sup>College of Geography and Environmental Sciences, Zhejiang Normal University, Zhejiang  
Province Jinhua 321004, People's Republic of China

**Table S.I. captions:**

**Table S.I.1** Different isotherm models used in this study and their linear forms

**Table S.I.2** Parameters of the isotherm models for the adsorption processes

**Table S.I.3** Isotherm parameters of OII and MO adsorption from binary solutions

**Table S.I.4** Comparison of the maximum uptake capacities of OII and MO dyes on various porous carbons.

**Table S.I.5** Kinetic parameters for OII and MO adsorption from SDS and BDS

**Table S.I.1** Different isotherm models used in this study and their linear forms

| Isotherm   | Nonlinear form                       | Linear form                                                                        | Plot                             | Eqs. |
|------------|--------------------------------------|------------------------------------------------------------------------------------|----------------------------------|------|
| Langmuir-I | $q_e = \frac{K_L C_e}{1 + K_L C_e}$  | $\frac{C_e}{q_e} = \frac{1}{q_L \cdot K_L} + \left(\frac{1}{q_L}\right) \cdot C_e$ | $\frac{C_e}{q_e}$ versus $C_e$   | (4)  |
| Freundlich | $q_e = K_f C_e^{\frac{1}{n}}$        | $\ln q_e = \ln K_f + \left(\frac{1}{n}\right) \cdot \ln C_e$                       | $\ln q_e$ versus $\ln C_e$       | (5)  |
| Temkin     | $q_e = ((RT/b_T) \ln(A \cdot C_e))$  | $q_e = \beta \ln K_T + \beta \ln C_e$                                              | $q_e$ versus $\ln C_e$           | (6)  |
| D-R        | $q_e = q_s e^{(-K_D \varepsilon^2)}$ | $\ln q_e = \ln q_s - K_D \varepsilon^2$                                            | $\ln q_e$ versus $\varepsilon^2$ | (7)  |

Where  $q_m$  is the maximum capacity of adsorption in mg/g;  $K_L$  is a constant related to the affinity of the binding sites in L/mg; ' $K_f$ ' and ' $n$ ' are the measures of adsorption capacity and intensity of adsorption;  $\beta = (RT)/b_T$ , is the Temkin constant;  $T$  is the absolute temperature in K;  $R$  is the universal gas constant;  $b_T$  is related to the heat of adsorption in kJ/mol.;  $K_T$  is the equilibrium binding constant in L/mol.;  $q_s$  is the D-R isotherm constant in mg/g;  $\varepsilon$  represents the Polanyi

potential constant in kJ mol<sup>-1</sup>;  $\varepsilon = RT \ln\left(1 + \frac{1}{C_e}\right)$

**Table S.I.2** Parameters of the isotherm models for the adsorption processes

| Isotherm   |                                            | SDS                  |        |                      |        | BDS                  |        |                      |        |
|------------|--------------------------------------------|----------------------|--------|----------------------|--------|----------------------|--------|----------------------|--------|
|            |                                            | OII                  |        | MO                   |        | OII                  |        | MO                   |        |
| Model      | Parameter                                  | Value                | $R^2$  | Value                | $R^2$  | Value                | $R^2$  | Value                | $R^2$  |
| Langmuir   | $q_L$ (mg/g)                               | 1501                 | 0.9996 | 870                  | 0.9999 | 962                  | 0.9998 | 448                  | 0.9999 |
|            | $K_L$ (L/g)                                | 0.25                 |        | 0.50                 |        | 0.29                 |        | 0.49                 |        |
| Freundlich | $k_f$ (L/g)                                | 990                  | 0.9855 | 647                  | 0.8789 | 496                  | 0.9417 | 369                  | 0.9178 |
|            | $n$                                        | 13.84                |        | 19.12                |        | 8.15                 |        | 29.47                |        |
| Temkin     | $b_T$ (kJ/mol)                             | 28.02                | 0.9892 | 60.51                | 0.8857 | 30.88                | 0.9425 | 180                  | 0.9293 |
|            | $K_T$ (L/g)                                | $6.6 \times 10^4$    |        | $5.7 \times 10^6$    |        | 582                  |        | $4.4 \times 10^{11}$ |        |
| D-R        | $q_s$ (mg/g)                               | 1393                 | 0.7117 | 861                  | 0.9609 | 827                  | 0.5366 | 441                  | 0.9232 |
|            | $K_D$ (mol <sup>2</sup> /kJ <sup>2</sup> ) | $1.0 \times 10^{-7}$ |        | $1.9 \times 10^{-6}$ |        | $2.4 \times 10^{-8}$ |        | $8.7 \times 10^{-8}$ |        |

**Table S.I.3** Isotherm parameters of OII and MO adsorption from binary solutions

| Sample | Dye | Competitive-Langmuir isotherm |                    |                        |                    |       | Langmuir        |                 |        |
|--------|-----|-------------------------------|--------------------|------------------------|--------------------|-------|-----------------|-----------------|--------|
|        |     | $q_{\max 1}$<br>(mg/L)        | $K_{L1}$<br>(L/mg) | $q_{\max 2}$<br>(mg/L) | $K_{L2}$<br>(L/mg) | $R^2$ | $q_L$<br>(mg/g) | $K_L$<br>(L/mg) | $R^2$  |
| MPC-1  | OII | 1000                          | 56.34              | –                      | –                  | 0.815 | 962             | 0.29            | 0.9998 |
|        | MO  | –                             | –                  | 500                    | 2.00               | 0.982 | 448             | 0.49            | 0.9999 |

**Table S.I.4** Comparative assessment of uptake capacity of OII and MO onto some adsorbents from partial previously literatures

| Dyestuff | Adsorbent | Maximum monolayer uptake capacities (mg/g) | Reference | System |
|----------|-----------|--------------------------------------------|-----------|--------|
| OII      | MCP-1     | 1488                                       | this work | SDS    |
|          | MCP-1     | 951                                        | this work | BDS    |
|          | ML        | 128                                        | this work | SDS    |
|          | ML        | 79                                         | this work | BDS    |
|          | CS-A.C.   | 322                                        | this work | SDS    |
|          | CS-A.C.   | 286                                        | this work | BDS    |
|          | NCTW      | 312                                        | 21        | SDS    |
|          | ACX       | 499                                        | 40        | SDS    |
|          | ACF       | 438                                        | 4         | SDS    |
|          | MCP-1     | 869                                        | this work | SDS    |
| MO       | MCP-1     | 447                                        | this work | BDS    |
|          | ML        | 115                                        | this work | SDS    |
|          | ML        | 72                                         | this work | BDS    |
|          | CS-A.C.   | 315                                        | this work | SDS    |
|          | CS-A.C.   | 280                                        | this work | BDS    |
|          | FAC       | 935                                        | 19        | SDS    |
|          | NPAC      | 161                                        | 41        | SDS    |
|          | MPW       | 286                                        | 42        | BDS    |

**Table S.I.5** Kinetic parameters for OII and MO adsorption from SDS and BDS

| System | Dye | Pseudo-first-order rate equation |                       |                  |        |                      | Pseudo-second-order rate equation |                       |                     |        |                      | Intra-particle diffusion model |               |                                     |        |
|--------|-----|----------------------------------|-----------------------|------------------|--------|----------------------|-----------------------------------|-----------------------|---------------------|--------|----------------------|--------------------------------|---------------|-------------------------------------|--------|
|        |     | $q_{e,exp}$<br>(mg/g)            | $q_{e,cal}$<br>(mg/g) | $K_1$<br>(1/min) | $R^2$  | $\Delta q$<br>(mg/g) | $\Delta q$<br>(%)                 | $q_{e,cal}$<br>(mg/g) | $K_2$<br>(g/mg·min) | $R^2$  | $\Delta q$<br>(mg/g) | $\Delta q$<br>(%)              | $C$<br>(mg/g) | $K_3$<br>(mg/g·min <sup>1/2</sup> ) | $R^2$  |
| SDS    | OII | 1450                             | 1082                  | 0.2739           | 0.9536 | 368                  | 25.38                             | 1512                  | 0.8412              | 0.9991 | -61.8                | -4.26                          | 704           | 159                                 | 0.8206 |
|        | MO  | 827                              | 227                   | 0.1449           | 0.9386 | 600                  | 72.55                             | 840                   | 1.7838              | 0.9998 | -12.9                | -1.56                          | 546           | 61                                  | 0.6667 |
| TDS    | OII | 757                              | 475                   | 0.1869           | 0.9250 | 282                  | 37.24                             | 807                   | 0.5487              | 0.9992 | -49.9                | -6.59                          | 391           | 78                                  | 0.7410 |
|        | MO  | 479                              | 52                    | 0.1805           | 0.7305 | 427                  | 89.15                             | 488                   | 2.0677              | 0.9988 | -9.2                 | -1.92                          | 368           | 25                                  | 0.3118 |
